# Supplementary material
Source: Springer Nature journal article supplement (https://www.springermedizin.de/resource/supplementary/12875_2004_67_MOESM1_ESM.pdf/9436214)
Supplement: MOESM1 [file 9436214]

### Studies excluded from the review

| Papers excluded from analysis                                                                                                                                                                                                                                                                                                               | Reason for exclusion                                                                    |
|---------------------------------------------------------------------------------------------------------------------------------------------------------------------------------------------------------------------------------------------------------------------------------------------------------------------------------------------|-----------------------------------------------------------------------------------------|
| Barrett JE, Williams JW, Jr., Oxman TE, Frank E, Katon W, Sullivan M, Hegel MT, Cornell JE, Sengupta AS: Treatment of dysthymia and minor depression in primary care: a randomized trial in patients aged 18 to 59 years. <i>J Fam Pract</i> 2001, 50: 405-412.                                                                             | Not MDD                                                                                 |
| Bedi N, Chilvers C, Churchill R, Dewey M, Duggan C, Fielding K, Gretton V, Miller P, Harrison G, Lee A, Williams I: Assessing effectiveness of treatment of depression in primary care. Partially randomised preference trial. <i>Br J Psychiatry</i> 2000, 177: 312-318.                                                                   | Not RCT                                                                                 |
| Bouchard JM, Delaunay J, Delisle JP, Grasset N, Mermberg PF, Molczadzki M, Pagot R, Richou H, Robert G, Ropert R, .: Citalopram versus maprotiline: a controlled, clinical multicentre trial in depressed patients. <i>Acta Psychiatr Scand</i> 1987, 76: 583-592.                                                                          | Unable to determine if patients came from primary care population                       |
| Boudreau DM, Capoccia KL, Sullivan SD, Blough DK, Ellsworth AJ, Clark DL, Katon WJ, Walker EA, Stevens NG: Collaborative care model to improve outcomes in major depression. <i>Ann Pharmacother</i> 2002, 36: 585-591.                                                                                                                     | Remission rates not included                                                            |
| Bougerol T, Scotto JC, Patris M, Strub N, Lemming S, Hopfner Peterson HE. Citalopram and fluoxetine in major depression. Comparison of two clinical trials in a psychiatrist setting and in general practice. <i>Clinical Drug Investigation</i> 14[2], 77-89. 1997.                                                                        | 2 studies, one of which is a repeat of the Patris article which is included in analysis |
| Browne G, Steiner M, Roberts J, Gafni A, Byrne C, Dunn E, Bell B, Mills M, Chalklin L, Wallik D, Kraemer J: Sertraline and/or interpersonal psychotherapy for patients with dysthymic disorder in primary care: 6-month comparison with longitudinal 2-year follow-up of effectiveness and costs. <i>J Affect Disord</i> 2002, 68: 317-330. | Not MDD; remission rates not included                                                   |
| Coyne JC, Klinkman MS, Gallo SM, Schwenk TL: Short-term outcomes of detected and undetected depressed primary care patients and depressed psychiatric patients. <i>Gen Hosp Psychiatry</i> 1997, 19: 333-343.                                                                                                                               | Not RCT                                                                                 |
| Finley PR, Rens HR, Pont JT, Gess SL, Louie C, Bull SA, Bero LA: Impact of a collaborative pharmacy practice model on the treatment of depression in primary care. <i>Am J Health Syst Pharm</i> 2002, 59: 1518-1526.                                                                                                                       | Remission rates not included                                                            |
| Frank E, Rucci P, Katon W, Barrett J, Williams JW, Jr., Oxman T, Sullivan M, Cornell J: Correlates of remission in primary care patients treated for minor depression. <i>Gen Hosp Psychiatry</i> 2002, 24: 12-19.                                                                                                                          | Not MDD                                                                                 |

|                                                                                                                                                                                                                                                                                                    |                                                                             |
|----------------------------------------------------------------------------------------------------------------------------------------------------------------------------------------------------------------------------------------------------------------------------------------------------|-----------------------------------------------------------------------------|
| Hedrick SC, Chaney EF, Felker B, Liu CF, Hasenberg N, Heagerty P, Buchanan J, Bagala R, Greenberg D, Paden G, Fihn SD, Katon W: Effectiveness of collaborative care depression treatment in Veterans' Affairs primary care. <i>J Gen Intern Med</i> 2003, 18: 9-16.                                | Not MDD; remission rates not included                                       |
| Hunkeler EM, Meresman JF, Hargreaves WA, Fireman B, Berman WH, Kirsch AJ, Groebe J, Hurt SW, Braden P, Getzell M, Feigenbaum PA, Peng T, Salzer M: Efficacy of nurse telehealth care and peer support in augmenting treatment of depression in primary care. <i>Arch Fam Med</i> 2000, 9: 700-708. | Remission rates not included                                                |
| Jacob KS, Bhugra D, Mann AH: A randomised controlled trial of an educational intervention for depression among Asian women in primary care in the United Kingdom. <i>Int J Soc Psychiatry</i> 2002, 48: 139-148.                                                                                   | Not MDD                                                                     |
| Katon W, Von KM, Lin E, Walker E, Simon GE, Bush T, Robinson P, Russo J: Collaborative management to achieve treatment guidelines. Impact on depression in primary care. <i>JAMA</i> 1995, 273: 1026-1031.                                                                                         | Remission rates not included                                                |
| Katon W, Robinson P, Von KM, Lin E, Bush T, Ludman E, Simon G, Walker E: A multifaceted intervention to improve treatment of depression in primary care. <i>Arch Gen Psychiatry</i> 1996, 53: 924-932.                                                                                             | Remission rates not included                                                |
| Kroenke K, West SL, Swindle R, Gilseman A, Eckert GJ, Dolor R, Stang P, Zhou XH, Hays R, Weinberger M: Similar effectiveness of paroxetine, fluoxetine, and sertraline in primary care: a randomized trial. <i>JAMA</i> 2001, 286: 2947-2955.                                                      | Remission rates not included                                                |
| Lin EH, Simon GE, Katon WJ, Russo JE, Von KM, Bush TM, Ludman EJ, Walker EA: Can enhanced acute-phase treatment of depression improve long-term outcomes? A report of randomized trials in primary care. <i>Am J Psychiatry</i> 1999, 156: 643-645.                                                | Follow-up assessment to the two Katon studies; remission rates not included |
| Lin EH, VonKorff M, Russo J, Katon W, Simon GE, Unutzer J, Bush T, Walker E, Ludman E: Can depression treatment in primary care reduce disability? A stepped care approach. <i>Arch Fam Med</i> 2000, 9: 1052-1058.                                                                                | Remission rates not included                                                |
| Malt UF, Robak OH, Madsbu HP, Bakke O, Loeb M: The Norwegian naturalistic treatment study of depression in general practice (NORDEP)-I: randomised double blind study. <i>BMJ</i> 1999, 318: 1180-1184.                                                                                            | Remission rates not included                                                |
| Mann AH, Blizard R, Murray J, Smith JA, Botega N, MacDonald E, Wilkinson G: An evaluation of practice nurses working with general practitioners to treat people with depression. <i>Br J Gen Pract</i> 1998, 48: 875-879.                                                                          | Not MDD                                                                     |

|                                                                                                                                                                                                                                                                                        |                                       |
|----------------------------------------------------------------------------------------------------------------------------------------------------------------------------------------------------------------------------------------------------------------------------------------|---------------------------------------|
| Peveler R, George C, Kinmonth AL, Campbell M, Thompson C: Effect of antidepressant drug counselling and information leaflets on adherence to drug treatment in primary care: randomised controlled trial. <i>BMJ</i> 1999, 319: 612-615.                                               | Remission rates not included          |
| Ravindran AV, Anisman H, Merali Z, Charbonneau Y, Telner J, Bialik RJ, Wiens A, Ellis J, Griffiths J: Treatment of primary dysthymia with group cognitive therapy and pharmacotherapy: clinical symptoms and functional impairments. <i>Am J Psychiatry</i> 1999, 156: 1608-1617.      | Not MDD; remission rates not included |
| Schmaling KB, Dimidjian S, Katon W, Sullivan M: Response styles among patients with minor depression and dysthymia in primary care. <i>J Abnorm Psychol</i> 2002, 111: 350-356.                                                                                                        | Not MDD                               |
| Schweizer E, Rickels K, Hassman H, Garcia-Espana F: Buspirone and imipramine for the treatment of major depression in the elderly. <i>J Clin Psychiatry</i> 1998, 59: 175-183.                                                                                                         | Geriatric population                  |
| Simon GE, VonKorff M, Rutter C, Wagner E: Randomised trial of monitoring, feedback, and management of care by telephone to improve treatment of depression in primary care. <i>BMJ</i> 2000, 320: 550-554.                                                                             | Remission rates not clearly reported  |
| Simpson S, Corney R, Fitzgerald P, Beecham J: A randomized controlled trial to evaluate the effectiveness and cost-effectiveness of psychodynamic counselling for general practice patients with chronic depression. <i>Psychol Med</i> 2003, 33: 229-239.                             | Not MDD; remission rates not included |
| Sullivan MD, Katon WJ, Russo JE, Frank E, Barrett JE, Oxman TE, Williams JW, Jr.: Patient beliefs predict response to paroxetine among primary care patients with dysthymia and minor depression. <i>J Am Board Fam Pract</i> 2003, 16: 22-31.                                         | Not MDD                               |
| Taragano F, Lyketsos CG, Paz J, Schapira M, Comesana DE, Klimovsky S: An open-label trial of sertraline for the treatment of major depression in primary care. <i>Ann Clin Psychiatry</i> 1999, 11: 67-71.                                                                             | Not RCT                               |
| Thomas L, Mulsant BH, Solano FX, Black AM, Bensasi S, Flynn T, Harman JS, Rollman BL, Post EP, Pollock BG, Reynolds CF, III: Response speed and rate of remission in primary and specialty care of elderly patients with depression. <i>Am J Geriatr Psychiatry</i> 2002, 10: 583-591. | Geriatric population                  |
| Thompson C, Peveler RC, Stephenson D, McKendrick J: Compliance with antidepressant medication in the treatment of major depressive disorder in primary care: a randomized comparison of fluoxetine and a tricyclic antidepressant. <i>Am J Psychiatry</i> 2000, 157: 338-343.          | Remission rates not included          |

|                                                                                                                                                                                                                                                                                                                                      |                                                |
|--------------------------------------------------------------------------------------------------------------------------------------------------------------------------------------------------------------------------------------------------------------------------------------------------------------------------------------|------------------------------------------------|
| <p>Unutzer J, Katon W, Williams Jr JW, Callahan CM, Harpole L, Hunkeler EM, Hoffing M, Arean P, Hegel MT, Schoenbaum M, Oishi SM, Langston CA: Improving primary care for depression in late life the design of a multicenter randomized trial. Med Care 2001, 39: 785-799.</p>                                                      | <p>Geriatric population</p>                    |
| <p>Unutzer J, Katon W, Callahan CM, Williams JW, Jr., Hunkeler E, Harpole L, Hoffing M, Della Penna RD, Noel PH, Lin EH, Arean PA, Hegel MT, Tang L, Belin TR, Oishi S, Langston C: Collaborative care management of late-life depression in the primary care setting: a randomized controlled trial. JAMA 2002, 288: 2836-2845.</p> | <p>Geriatric population</p>                    |
| <p>Wells KB, Sherbourne C, Schoenbaum M, Duan N, Meredith L, Unutzer J, Miranda J, Carney MF, Rubenstein LV: Impact of disseminating quality improvement programs for depression in managed primary care: a randomized controlled trial. JAMA 2000, 283: 212-220.</p>                                                                | <p>Remission rates not included; quasi RCT</p> |
| <p>Williams JW, Jr., Barrett J, Oxman T, Frank E, Katon W, Sullivan M, Cornell J, Sengupta A: Treatment of Dysthymia and Minor Depression in Primary Care: A Randomized Controlled Trial in Older Adults. JAMA 2000, 284: 1519-1526.</p>                                                                                             | <p>Not MDD</p>                                 |
| <p>Worrall G, Angel J, Chaulk P, Clarke C, Robbins M: Effectiveness of an educational strategy to improve family physicians' detection and management of depression: a randomized controlled trial. CMAJ 1999, 161: 37-40.</p>                                                                                                       | <p>Remission rates not included</p>            |
